# Supplementary material for: Configuration effect in polyoxometalate-based dyes on the performance of DSSCs: an insight from a theoretical perspective
Source: Royal Society of Chemistry journal article supplement (doi:10.1039/d0cp02449j), 2020-01-01
Supplement: d0cp02449j1.pdf [file d0cp02449j1.pdf]

## **Supporting Information**

### **Configuration effect in polyoxometalate-based dyes on the performance of DSSCs: An insight from theoretical perspective**

Yu Gao, Wei Guan, Xue-Song Wang, Ran Jia, Li-Kai Yan\*, and Zhong-Min Su

Institute of Functional Material Chemistry, National & Local United Engineering Lab for Power Battery, Key Laboratory of Polyoxometalate Science of Ministry of Education, Faculty of Chemistry, Northeast Normal University, Changchun 130024, P. R. China, Fax: +86-431-5684009.

\*Corresponding author, E-mail address: yanlk924@nenu.edu.cn.

## 1. Theoretical background

The power conversion efficiency ( $\eta$ ) of DSSCs can be expressed as follows [1]:

$$\eta = FF \frac{V_{OC} J_{SC}}{I_S} \quad (1)$$

where  $J_{SC}$  is the short-circuit photocurrent density,  $V_{OC}$  is the open-circuit photovoltage,  $I_S$  is the intensity of the incident light and  $FF$  is the fill factor of the cell.

Accordingly, improving  $J_{SC}$  and  $V_{OC}$  is an effective method to enhance  $\eta$ . The  $J_{SC}$  can be defined as follows [2]:

$$J_{SC} = \int LHE(\lambda) \Phi_{inj} \eta_{collect} I_S(\lambda) d\lambda \quad (2)$$

where  $LHE(\lambda)$ , the light harvesting efficiency at a specific wavelength, is determined by  $LHE(\lambda) = 1 - 10^{-f}$  and  $f$  is the oscillator strength of dyes corresponding to the maximum absorption  $\lambda_{max}$ .  $\Phi_{inj}$  is the electron injection efficiency, and closely connected with  $k_{inj}$ , which can be described as follows:

$$k_{inj} = \frac{2\pi}{h} V_{DA}^2 \left( \frac{\pi}{\chi K_B T} \right)^{1/2} \exp\left[-\frac{\Delta G_{inj} + \chi}{4\chi K_B T}\right] \quad (3)$$

where  $V_{DA}$  is the coupling between the donor and acceptor states and  $\chi$  is the reorganization energy.  $\Delta G_{inj}$ , the driving force of electron injection from excited state of dyes to  $TiO_2$  surface, and can be determined by the following equation [3]:

$$\Delta G_{inj} = E_{dye}^* - E_{CB} \quad (4)$$

where  $E_{dye}^*$  is the oxidation potential of dye in excited state, which is related to the oxidation potential of dye in ground state ( $E_{dye}$ ) and the vertical transition energy ( $E_v$ ), i.e.,  $E_{dye}^* = E_{dye} - E_v$  [3].  $E_{CB}$  is the reduction potential of  $TiO_2$  conduction band (CB) and experimental value  $-4.00$  eV (vs vacuum) is used [4].  $\eta_{collect}$  is the charge

collection efficiency, which is assumed to be a constant for the same DSSCs.

As for  $V_{OC}$ , it can be defined by [5]:

$$V_{OC} = \frac{E_{CB}}{q} + \frac{kT}{q} \ln\left(\frac{n_c}{N_{CB}}\right) - \frac{E_{redox}}{q} \quad (5)$$

where  $n_c$  is the number of electrons in CB, while  $q$  and  $kT$  are constants, representing the unit charge and thermal energy, respectively.  $N_{CB}$  represents the accessible density of CB states and  $E_{redox}$  is the oxidation potential of electrolyte. The dye absorbed on  $TiO_2$  surface can lead to  $\Delta E_{CB}$  and further the larger  $E_{CB}$ . Hence, a dye with large  $n_c$  and  $\Delta E_{CB}$  will induce a significant increase of  $V_{OC}$ .

## 2. Details about the average dye electrostatic potential ( $V_{EL}$ )

The average dye electrostatic potential on the  $TiO_2$  surface was evaluated by the following [6]:

$$V_{EL} = \frac{1}{nTi} \sum_{i=1}^{n_{Ti}} \sum_{j=1}^{n_q} \frac{q_j}{r_{ij}} \quad (6)$$

where  $q_j$  is the  $j_{th}$  of the  $n_q$  dye point charge calculated by Merz-Kollman method [7,8] to obtain the atomic charge distributions. And  $r_{ij}$  represents the distances between these of charges and each of the titanium atoms in the superficial layer of  $TiO_2$  cluster.

## 3. Simulations of the electron injection

The time-dependent survival probabilities (TDSP) curves were defined as the probability of the photo-excited electron which is still in the adsorbed dye molecule at time  $t$ . Therefore, the TDSP can be computed by applying the time-evolved electronic wave function into the atomic orbitals of the adsorbed dye molecule.

The time-evolved wave function  $\varphi(t)$  can be written as a linear combination of atomic orbitals:

$$\varphi(t) = \sum_{i,j} B_{i,j}(t) \phi_{i,j} \quad (7)$$

where  $\phi_{i,j}$  represents the orbitals  $j$  of the  $i$ -th atom. The expansion coefficients  $B_{i,j}(t)$ , introduced in Eq. (7), can now be computed according to the follow equation:

$$B_{i,j}(t) = \sum_k Q_{i,j}^k C_k \exp\left(-\frac{i}{\hbar} E_k t\right) \quad (8)$$

The coefficient  $C_k$  in Eq. (8) is defined by the expansion of the initial state in an orthonormal basis set of  $\phi(k)$ ,

$$\varphi(0) = \sum_k C_k \phi(k) \quad (9)$$

The coefficient  $Q_{i,j}^k$  in this equation is defined according to the expansion of  $\phi(k)$  as a linear combination of the atomic orbitals:

$$\phi(k) = \sum_j Q_j^k \phi_j \quad (10)$$

The eigenvalue  $E_k$  in Eq. (8) can be obtained by solving the extend Hückel theory (EH) eigenvalue problem:

$$HQ^k = E_k SQ^k \quad (11)$$

where  $H$  is the EH matrix and  $S$  is the overlap matrix in the atomic orbital basis. The non-diagonal Hamiltonian matrix is here determined by the Wolfsberg-Helmholtz constant  $K$  and the overlapping matrix element:

$$H_{j,m} = KS_{jm} \frac{H_{jj} + H_{mm}}{2} \quad (12)$$

Usually, the constant  $K$  is set to be 1.75, and the  $S_{jm}$  is defined according to the overlap of the atomic orbitals:

$$S_{jm} = \langle \phi_j | \phi_m \rangle \quad (13)$$

Therefore, the projection of the time-evolved electronic wave function onto the atomic orbitals of the adsorbed dye molecular can be obtained as follows:

$$\rho_{\text{MOL}}(t) = |\sum_j^{\text{MOL}} \sum_m B_j^*(t) B_m(t) S_{jm}| \quad (14)$$

Note that the sum over  $m$  includes all of the atoms in the research object, whereas the sum over  $j$  only includes the atoms in the adsorbed dye molecular.

## References

- [1] Grätzel, M. Recent advances in sensitized mesoscopic solar cells. *Acc Chem Res* 2009; 42: 1788-1798.
- [2] Zhang JZ, Zhang J, Li HB, Wu Y, Xu HL, Zhang M, et al. Modulation on charge recombination and light harvesting toward high-performance benzothiadiazole-based sensitizers in dye-sensitized solar cells: A theoretical investigation. *J Power Sources* 2014; 267: 300-308.
- [3] Katoh R, Furube A, Yoshihara T, Hara K, Fujihashi G, Takano S, et al. Efficiencies of electron injection from excited N3 dye into nanocrystalline semiconductor (ZrO<sub>2</sub>, TiO<sub>2</sub>, ZnO, Nb<sub>2</sub>O<sub>5</sub>, SnO<sub>2</sub>, In<sub>2</sub>O<sub>3</sub>) films. *J Phys Chem B* 2004; 108: 4818-4822.
- [4] Grätzel M. Photoelectrochemical cells. *Nature* 2001; 414: 338-344.
- [5] Ning ZJ, Fu Y, Tian H. Improvement of dye-sensitized solar cells: what we know and what we need to know. *Energy Environ Sci* 2010; 3: 1170-1181.
- [6] Ronca, E., Pastore, M., Belpassi, L., Tarantelli, F., Angelis, F. D. Influence of the dye molecular structure on the TiO<sub>2</sub> conduction band in dye-sensitized solar cells:

disentangling charge transfer and electrostatic effects. *Energy Environ. Sci.* **2013**, *6*, 183–193.

[7] Singh, U. C., Kollman, P. A. An approach to computing electrostatic charges for molecules. *J. Comput. Chem.* **1984**, *5*, 129–145.

[8] Besler, B. H., Merz, K. M., Kollman, P. A. Atomic charges derived from semiempirical methods. *J. Comput. Chem.* **1990**, *11*, 431–439.

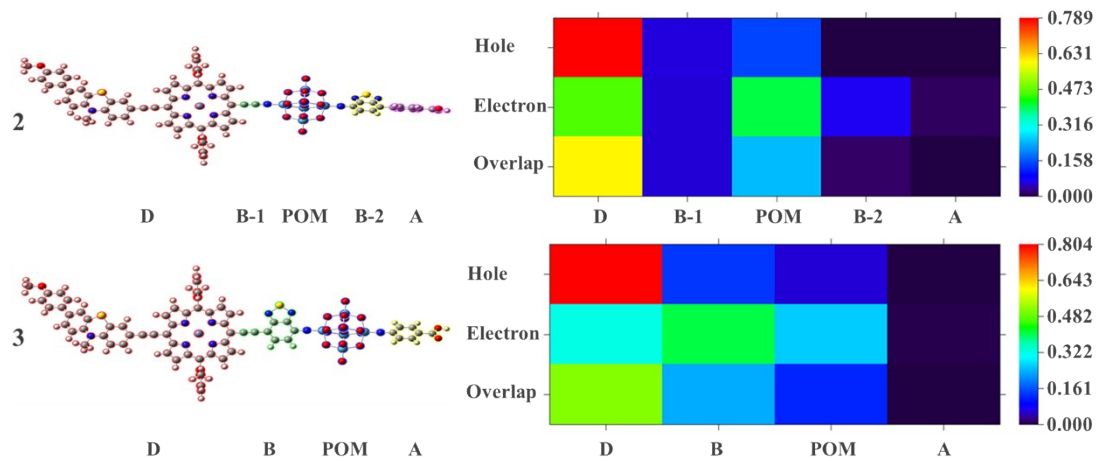

**Figure S1.** The heat map of dyes 2 and 3.

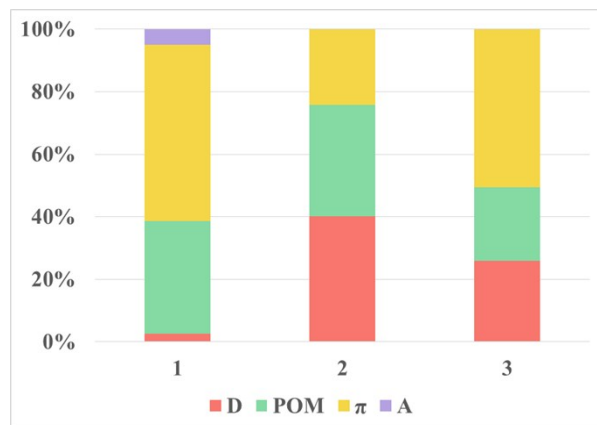

**Figure S2.** Molecular orbital compositions of LUMOs for studied dyes.



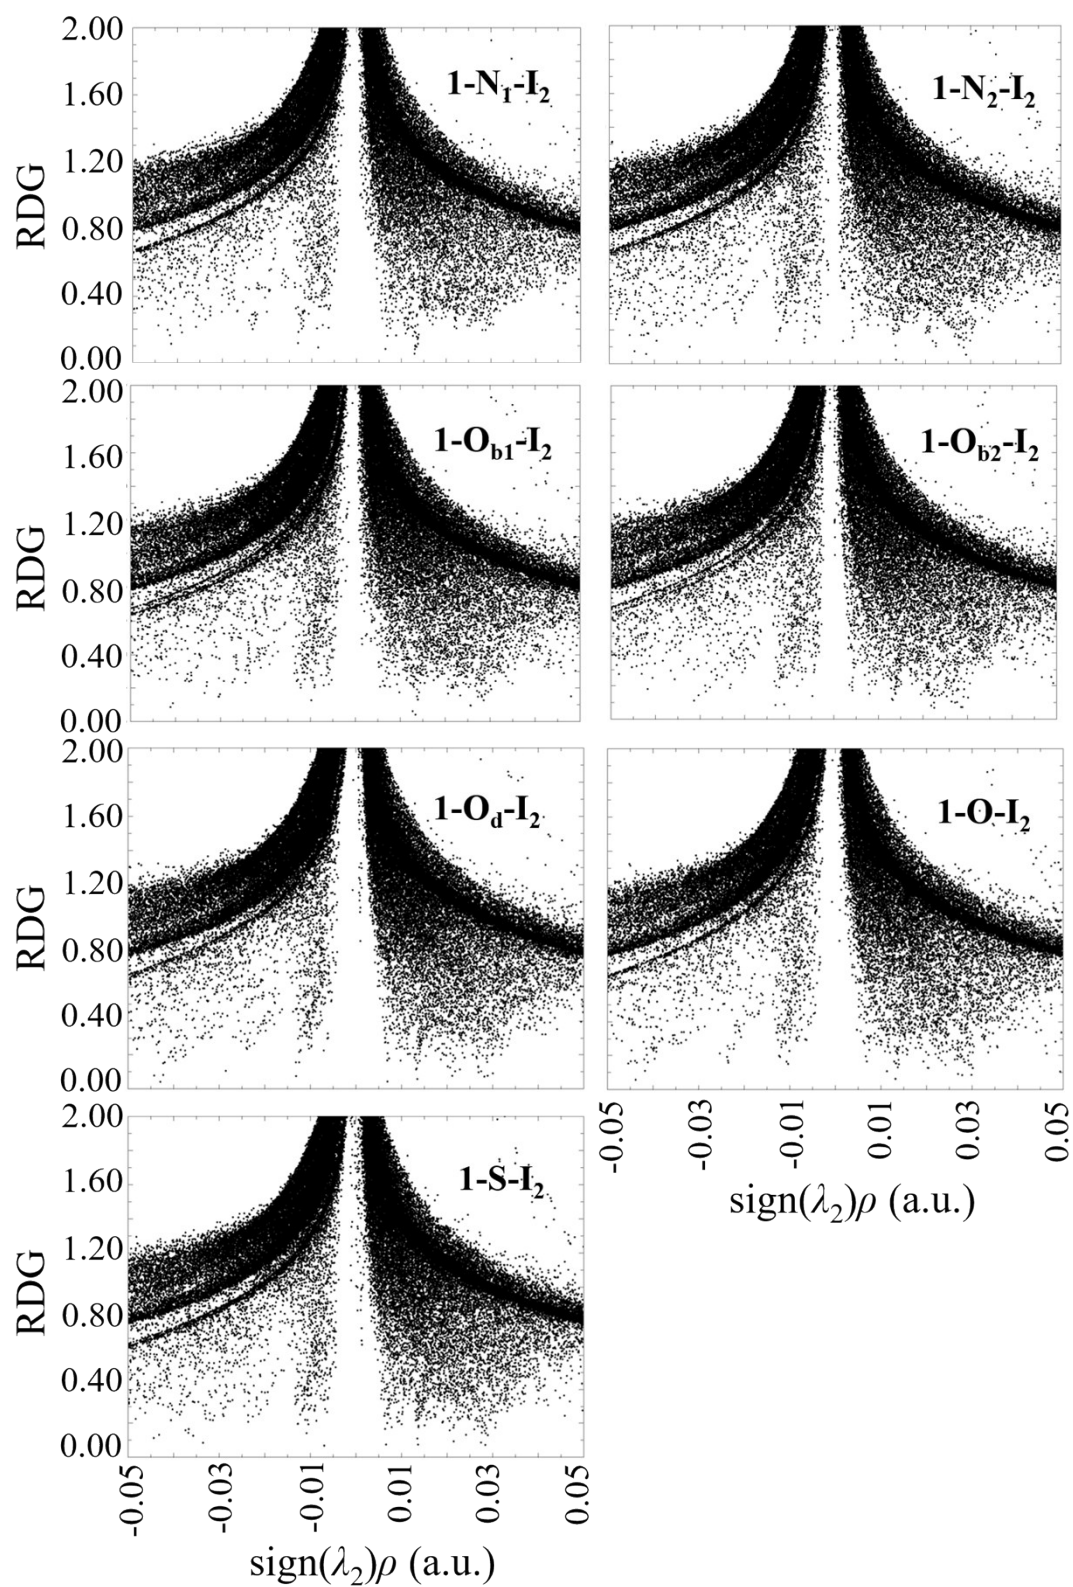

**Figure S3** The plots of RDG versus electron density  $\rho(r)$  multiplied by the sign of second Hessian eigenvalue  $\lambda_2$  for dye **1** and  $I_2$ .

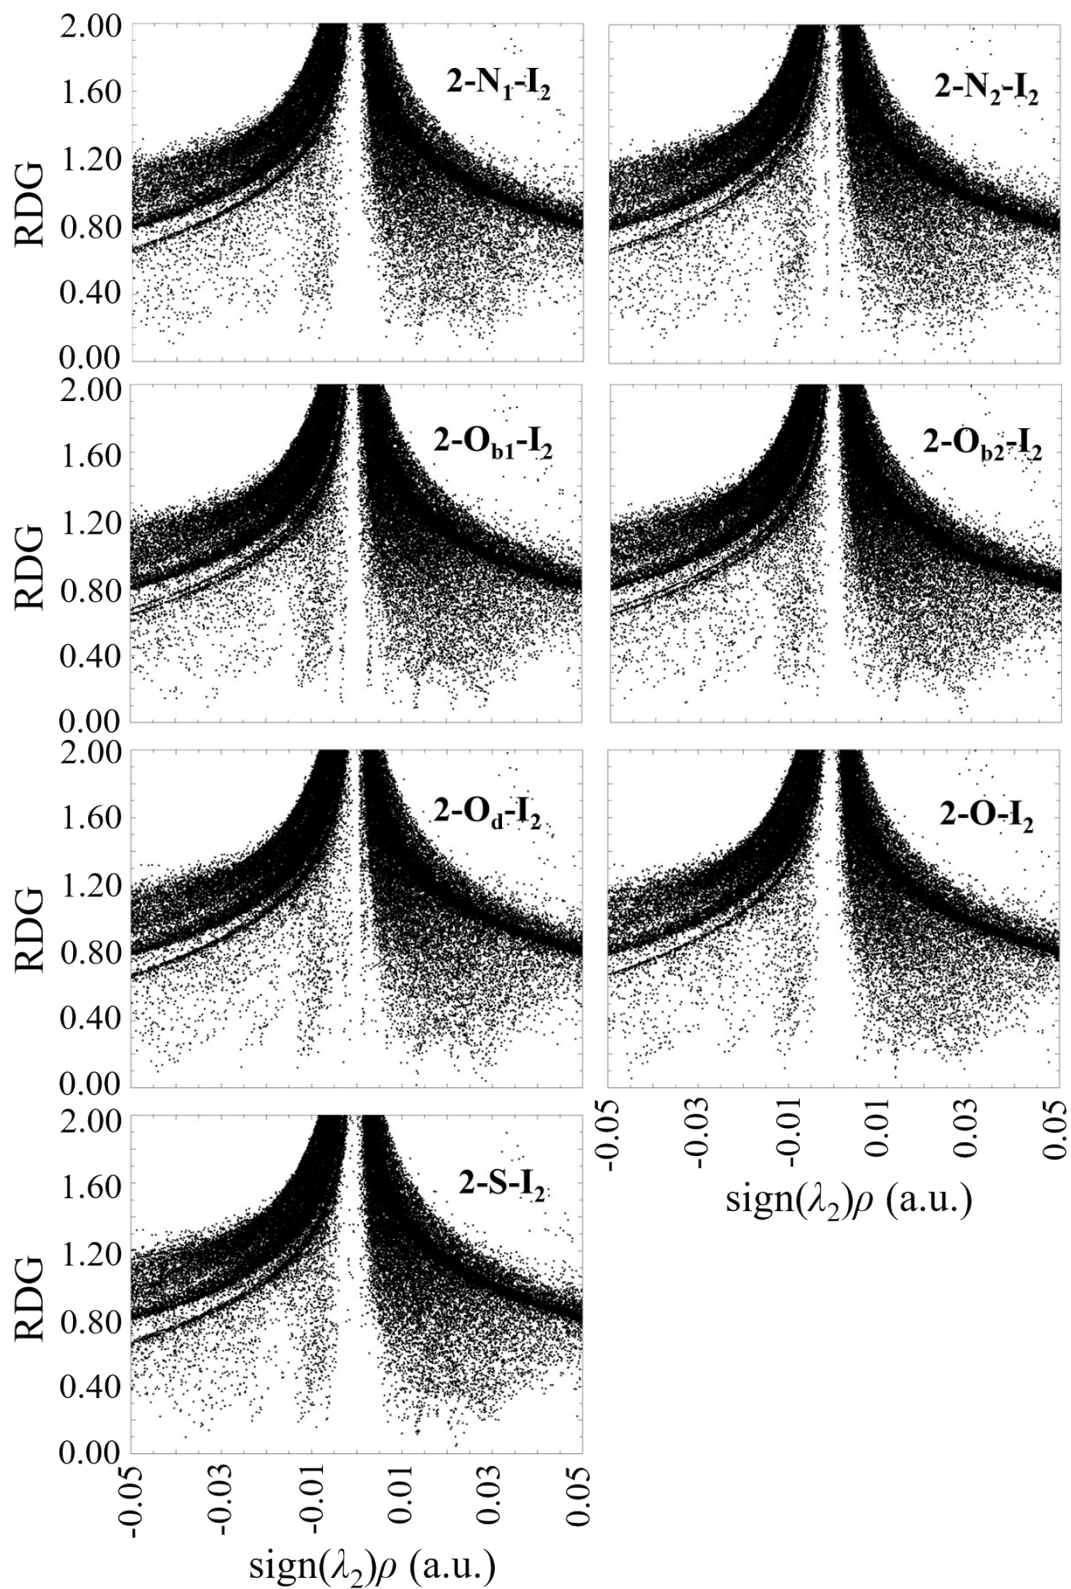

**Figure S4.** The plots of RDG versus electron density  $\rho(r)$  multiplied by the sign of second Hessian eigenvalue  $\lambda_2$  for dye **2** and  $I_2$ .

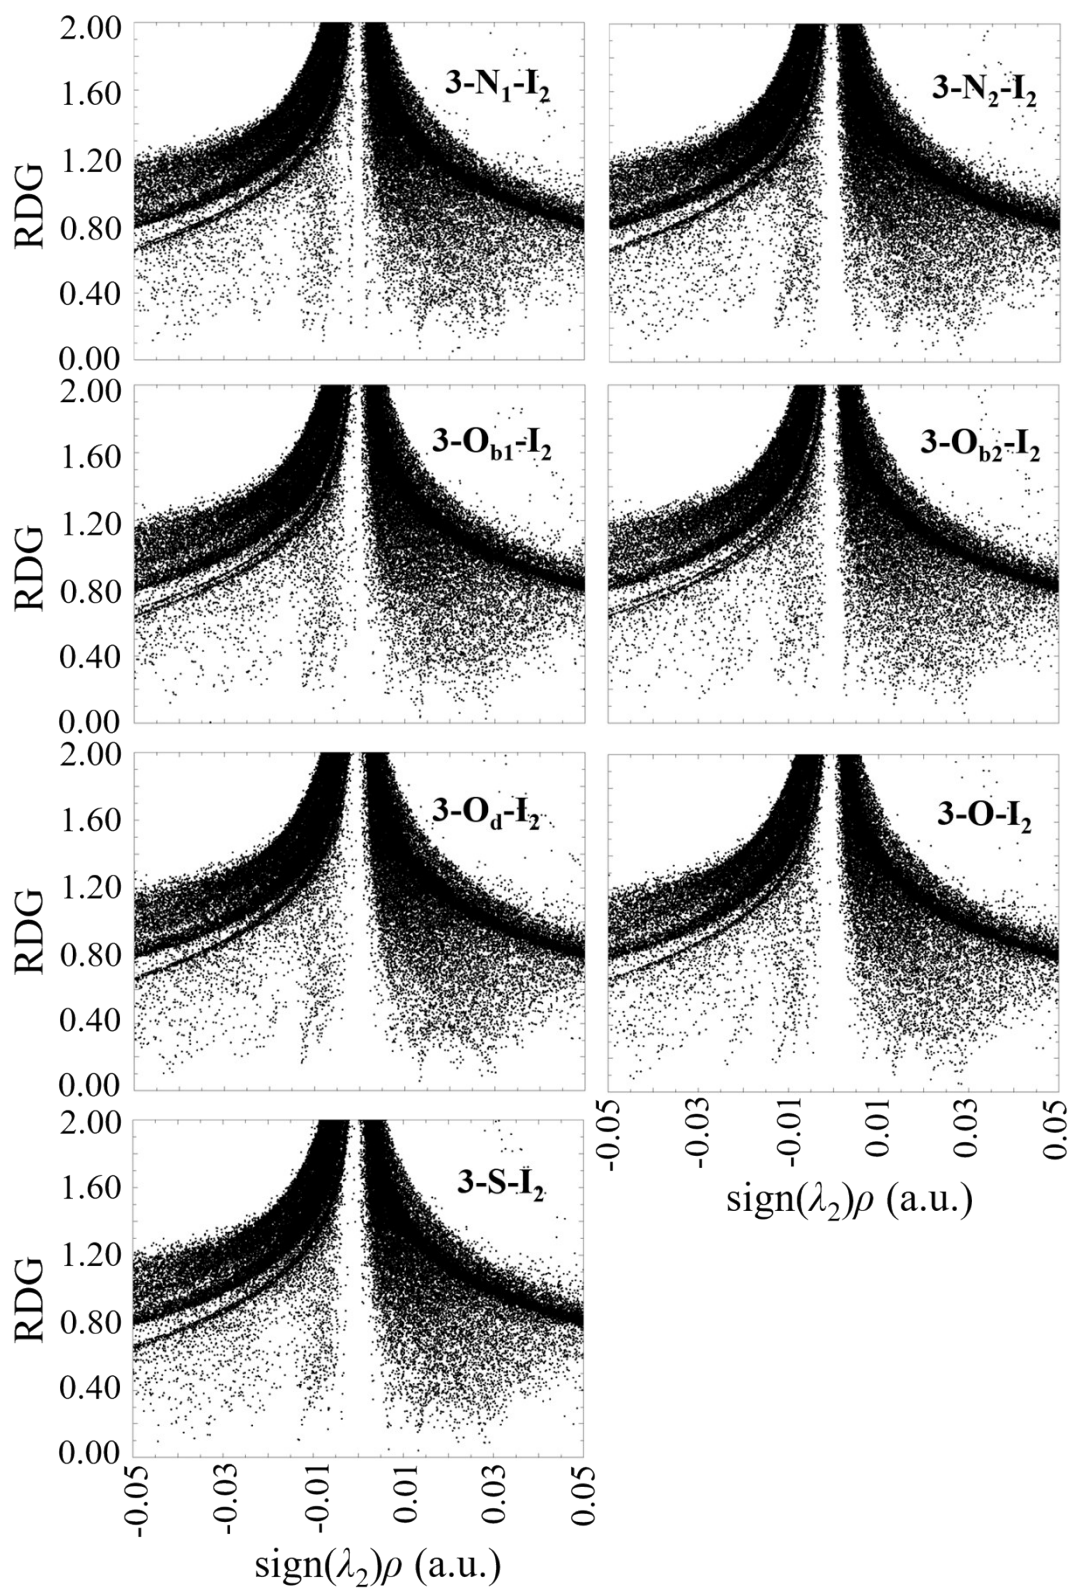

**Figure S5.** The plots of RDG versus electron density  $\rho(r)$  multiplied by the sign of second Hessian eigenvalue  $\lambda_2$  for dye **3** and  $I_2$ .

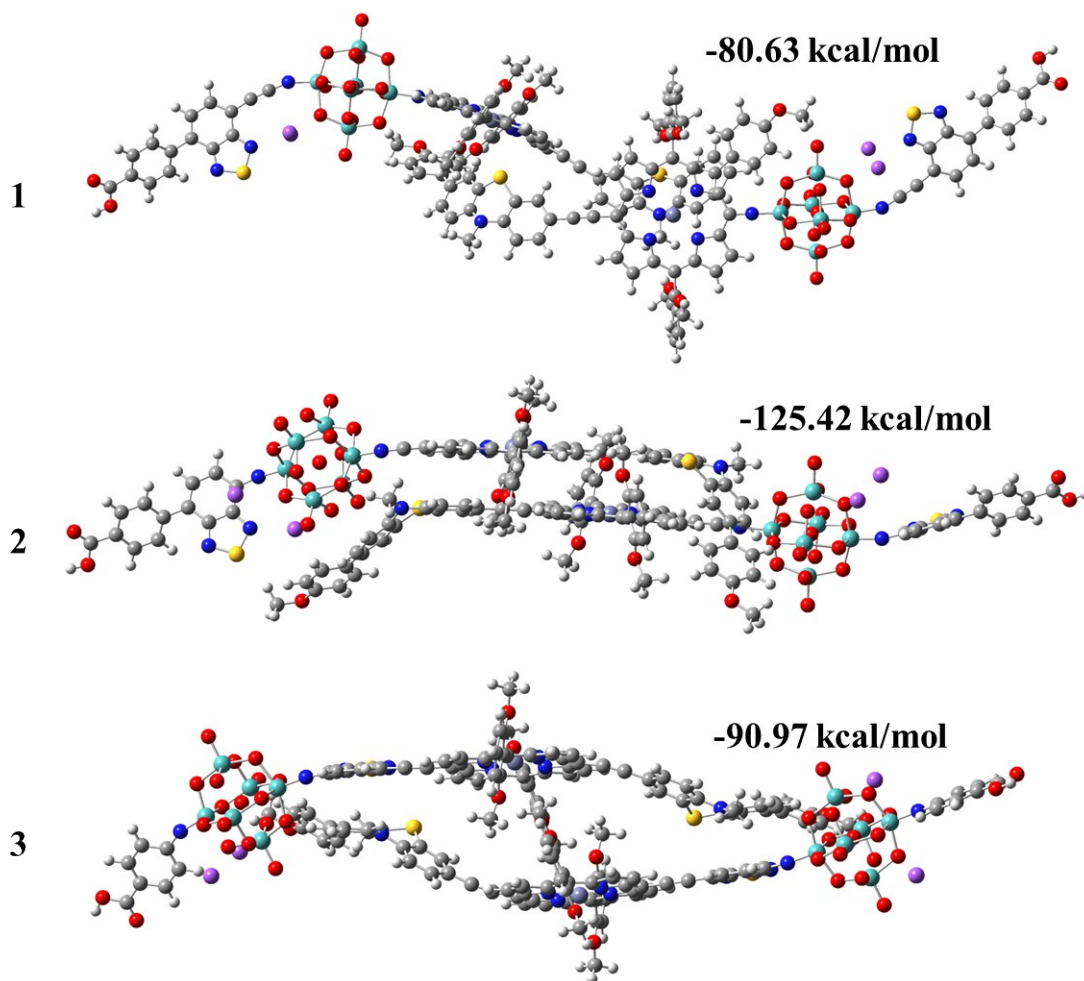

**Figure S6.** The optimized most stable dimer structures as well as the interaction energies  $\Delta E_{\text{tot}}$  for studied dyes.

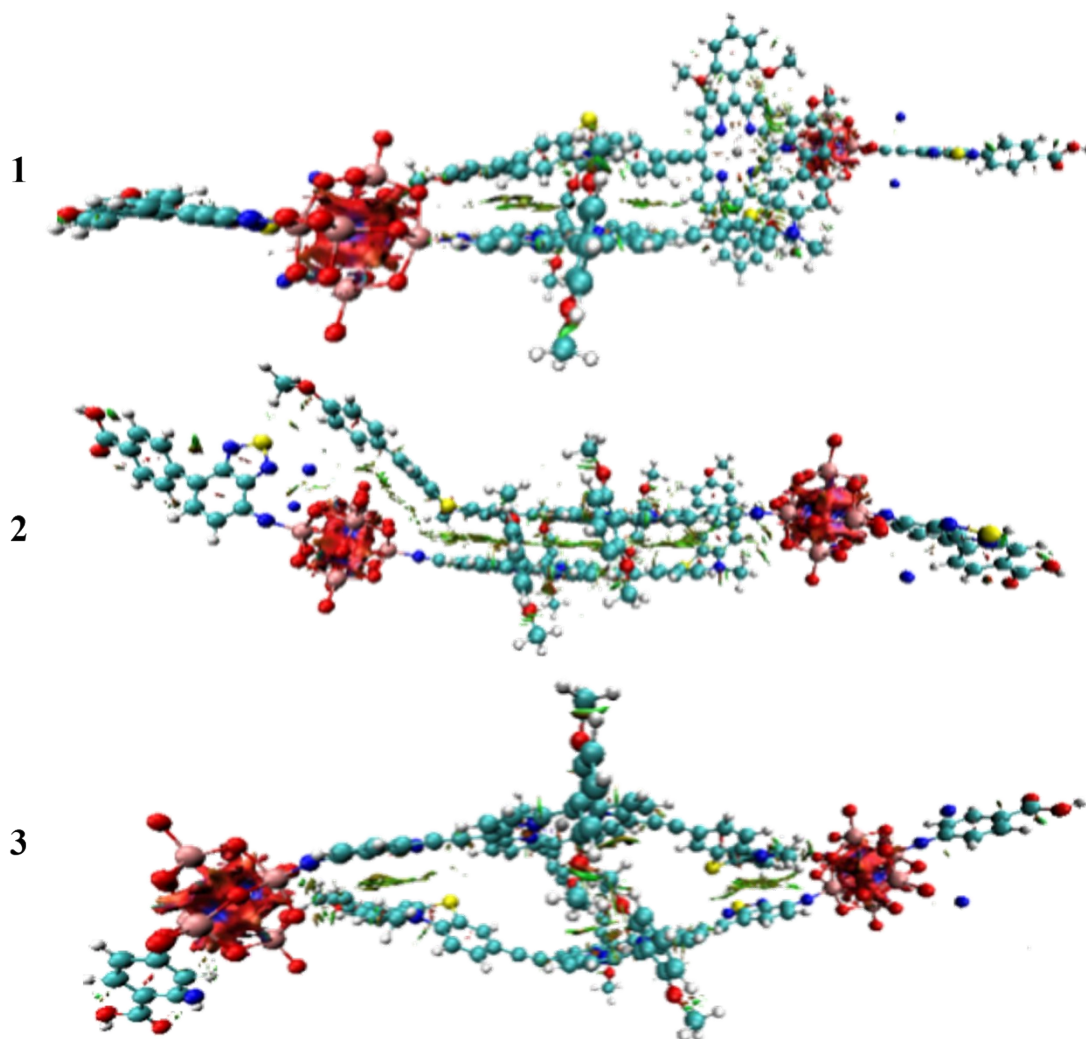

**Figure S7.** The plot of gradient isosurfaces with  $RDG = 0.5$  a.u. for studied dyes dimers.

**Table S1.** The experimental and theoretical absorption spectra data of **XW11**.

| <b>XW11</b> | $\lambda_{\text{max}}$ (nm) | $f$  |
|-------------|-----------------------------|------|
| Exp.        | 465                         | —    |
|             | 683                         | —    |
| PBE0        | 455                         | 1.00 |
|             | 705                         | 1.64 |

**Table S2.** CB shift ( $\Delta E_{\text{CB}}$ , eV), transfer charge ( $n_{\text{CT}}$ ,  $e^-$ ) for dyes adsorbed onto  $\text{TiO}_2$  and average electrostatic potential ( $V_{\text{EL}}$ , eV) of studied dyes.

| dye      | $\Delta E_{\text{CB}}$ | $n_{\text{CT}}$ | $V_{\text{EL}}$ |
|----------|------------------------|-----------------|-----------------|
| <b>1</b> | -0.009                 | 1.16            | -0.28           |
| <b>2</b> | -0.012                 | 1.25            | -0.30           |
| <b>3</b> | -0.041                 | 1.34            | -0.34           |
